# Supplementary material for: Retrieval of cloud fraction using machine learning algorithms based on FY-4A AGRI observations
Source: Copernicus journal article supplement (doi:10.5194/amt-17-6697-2024), 2024-11-25
Supplement: Supplementary file 1 [file amt-17-6697-2024-supplement.pdf]

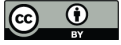

*Supplement of*

## **Retrieval of cloud fraction using machine learning algorithms based on FY-4A AGRI observations**

**Jinyi Xia and Li Guan**

*Correspondence to:* Li Guan ([liguan@nuist.edu.cn](mailto:liguan@nuist.edu.cn))

The copyright of individual parts of the supplement might differ from the article licence.

1. Influence on the model when the proportion of various cloud fraction in the training sample is different.

Table S1: Influence of samples with different proportions on model accuracy.

|                    |               | 5:1:1:1:1:1:5 |          |         |           | 1:1:1  |          |         |           |
|--------------------|---------------|---------------|----------|---------|-----------|--------|----------|---------|-----------|
| Sky Classification |               | Day RF        | Night RF | Day MLP | Night MLP | Day RF | Night RF | Day MLP | Night MLP |
| POD                | Clear Sky     | 0.964         | 0.919    | 0.959   | 0.905     | 0.935  | 0.895    | 0.931   | 0.890     |
|                    | Partly cloudy | 0.914         | 0.845    | 0.895   | 0.808     | 0.784  | 0.730    | 0.752   | 0.695     |
|                    | Overcast      | 0.959         | 0.919    | 0.957   | 0.920     | 0.926  | 0.910    | 0.924   | 0.904     |
| FAR                | Clear Sky     | 0.047         | 0.102    | 0.064   | 0.131     | 0.128  | 0.162    | 0.157   | 0.193     |
|                    | Partly cloudy | 0.078         | 0.153    | 0.085   | 0.172     | 0.152  | 0.215    | 0.159   | 0.225     |
|                    | Overcast      | 0.038         | 0.061    | 0.039   | 0.063     | 0.077  | 0.089    | 0.078   | 0.098     |

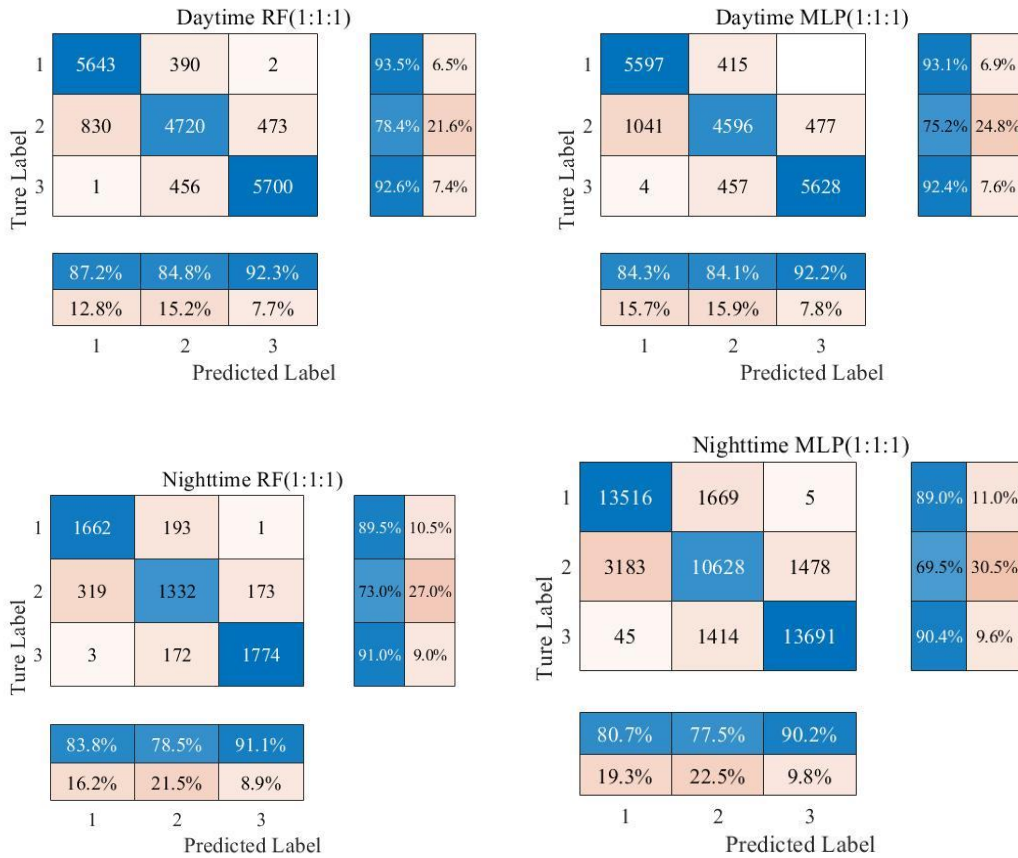

Fig. S1: In the training sample set, clear sky: partly cloudy: overcast = 1:1:1. That is, the accuracy of each model when the proportion of cloud fraction in partly cloudy is unknown.

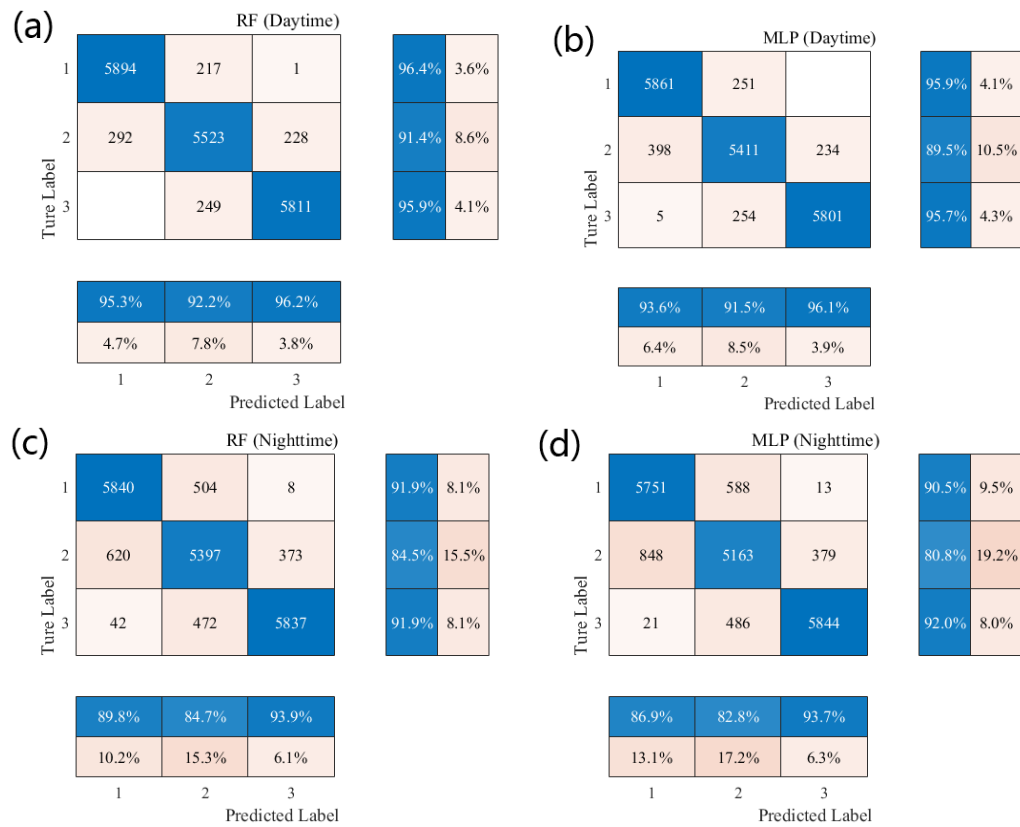

Fig. S2: The accuracy of each model when 0:0.16:0.33:0.5:0.67:0.83:1 = 5:1:1:1:1:1:5 in the training sample.

2. The results obtained by using different numbers of hidden layers.

Table S2. The influence of different numbers of hidden layers on the accuracy of the models.

| number of hidden layers | 2      | 3      | 4      | 5                    | 6      | 7      | 8      | 9      |
|-------------------------|--------|--------|--------|----------------------|--------|--------|--------|--------|
| Day CL accuracy         | 0.9067 | 0.9122 | 0.9337 | <b><u>0.9369</u></b> | 0.9360 | 0.9355 | 0.9355 | 0.9364 |
| Night CL accuracy       | 0.8605 | 0.8691 | 0.8838 | <b><u>0.8878</u></b> | 0.8843 | 0.8795 | 0.8845 | 0.8849 |

Table S3. The influence of different numbers of hidden layers on the precision of the models.

| number of hidden layers |      | 2       | 3       | 4                     | 5       | 6                     | 7       | 8       | 9       |
|-------------------------|------|---------|---------|-----------------------|---------|-----------------------|---------|---------|---------|
| Day RE                  | ME   | -0.0047 | 0.0037  | <b><u>-0.0009</u></b> | -0.0101 | -0.0024               | 0.0044  | 0.0042  | -0.0009 |
|                         | MAE  | 0.1397  | 0.1240  | <b><u>0.1053</u></b>  | 0.1048  | 0.1065                | 0.1036  | 0.1032  | 0.1301  |
|                         | RMSE | 0.1677  | 0.1513  | <b><u>0.1332</u></b>  | 0.1334  | 0.1314                | 0.1312  | 0.1319  | 0.1303  |
| Night RE                | ME   | -0.0006 | -0.0059 | 0.0009                | 0.0070  | <b><u>-0.0032</u></b> | -0.0006 | -0.0062 | -0.0043 |
|                         | MAE  | 0.1613  | 0.1510  | 0.1413                | 0.1371  | <b><u>0.1322</u></b>  | 0.1325  | 0.1310  | 0.1321  |
|                         | RMSE | 0.2133  | 0.1810  | 0.1716                | 0.1630  | <b><u>0.1623</u></b>  | 0.1633  | 0.1665  | 0.1625  |

According to the results in the above table, the following conclusions can be drawn: (1) MLP classification model for daytime: number of hidden layers = 5. (2) MLP classification model for nighttime: number of hidden layers = 5. (3) MLP regression model for daytime: number of hidden layers = 4. (4) MLP regression model for nighttime: number of hidden layers = 6.
